# Supplementary material for: Effect of an Oral Probiotic Mixture on Clinical Evolution, Gut and Skin Microbiome in Patients with Alopecia Areata: A Randomized Clinical Trial
Source: Preprints.org preprint supplement (doi:10.20944/preprints202406.0475.v1), 2024-06-10
Supplement: Supplementary file 1 [file supplementary]

**SUPPLEMENTARY MATERIAL**

**Figure S1.** Boxplot of α-diversity in stool samples at the ASV level according to the Shannon index.


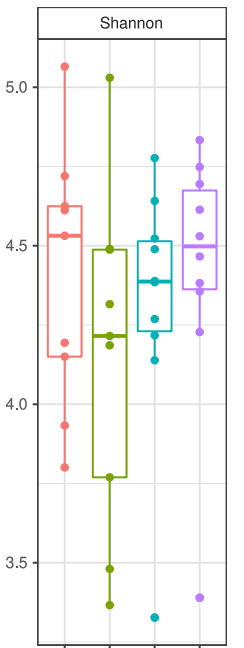


Red boxplot: Probiotic group, baseline. Orange boxplot: Probiotic group, week 24. Green boxplot: Placebo group, baseline. Blue boxplot: Placebo group, week 24.

**Figure S2.** Bacterial profiles of faecal samples from study groups at phylum level.

LCBD: Local contribution to beta‐diversity.

**Figure S3.** Bacterial profiles of faecal samples from study groups at family level.

LCBD: Local contribution to beta‐diversity.

**Figure S4.** Boxplot of α-diversity in skin samples at the ASV level according to the Shannon index.

Red boxplot: Probiotic group, baseline. Orange boxplot: Probiotic group, week 24. Green boxplot: Placebo group, baseline. Blue boxplot: Placebo group, week 24.

**Figure S5.** Bacterial profiles of skin samples from study groups at phylum level.

LCBD: Local contribution to beta‐diversity.

**Figure S6.** Bacterial profiles of skin samples from study groups at family level.

LCBD: Local contribution to beta‐diversity.
